# Supplementary material
Source: PubMed Central journal article supplement (PMC2141891)

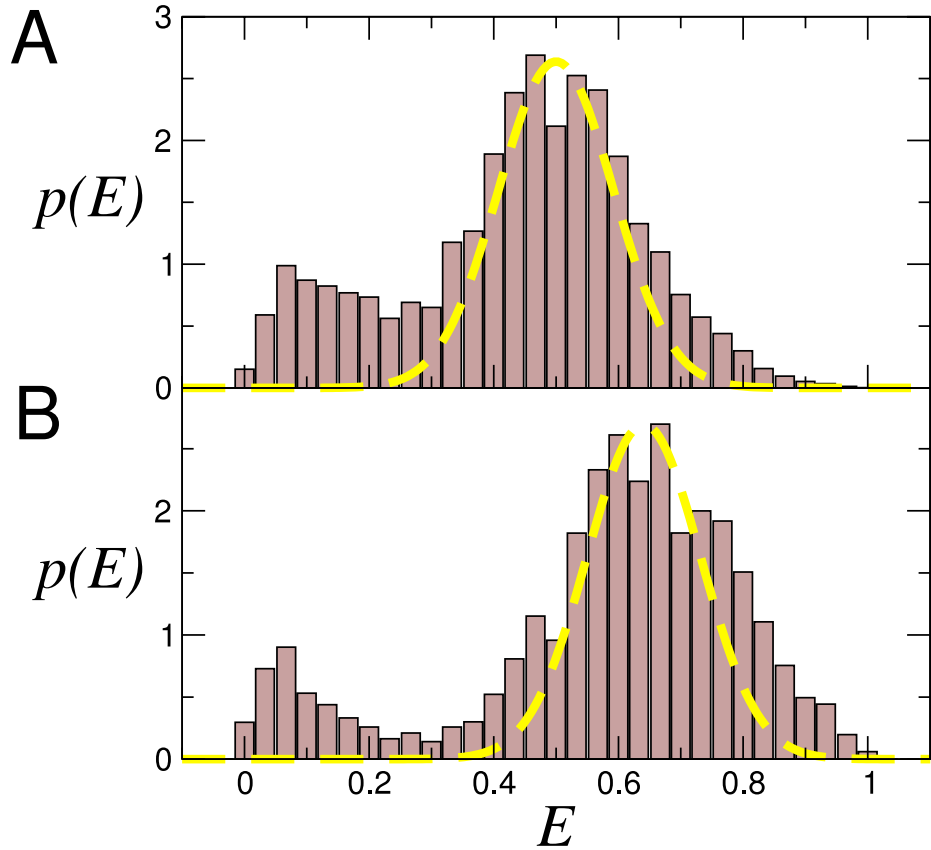

Supplement: pnas_0709567104_1.pdf [file pnas_0709567104_1.pdf]

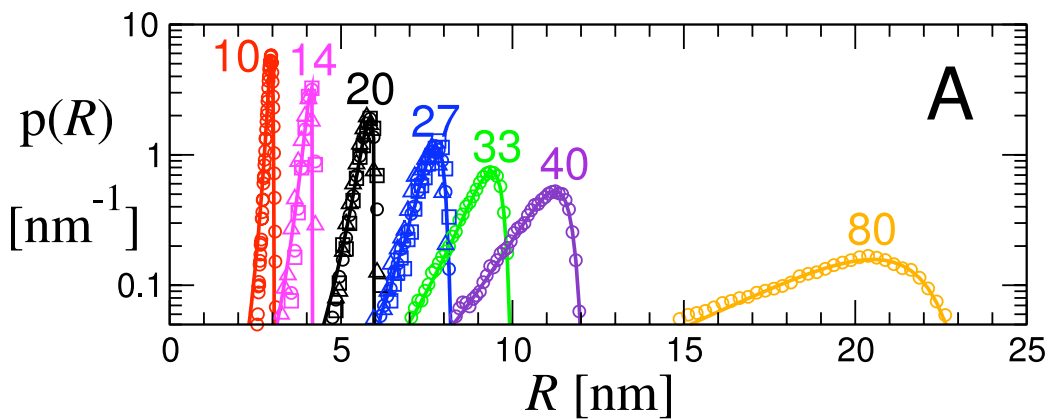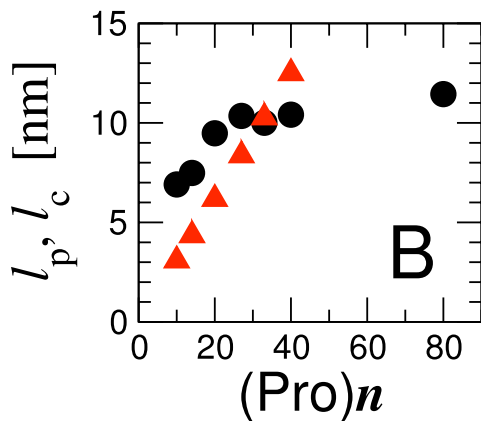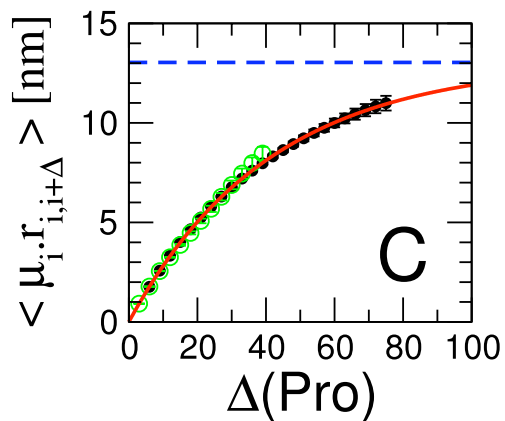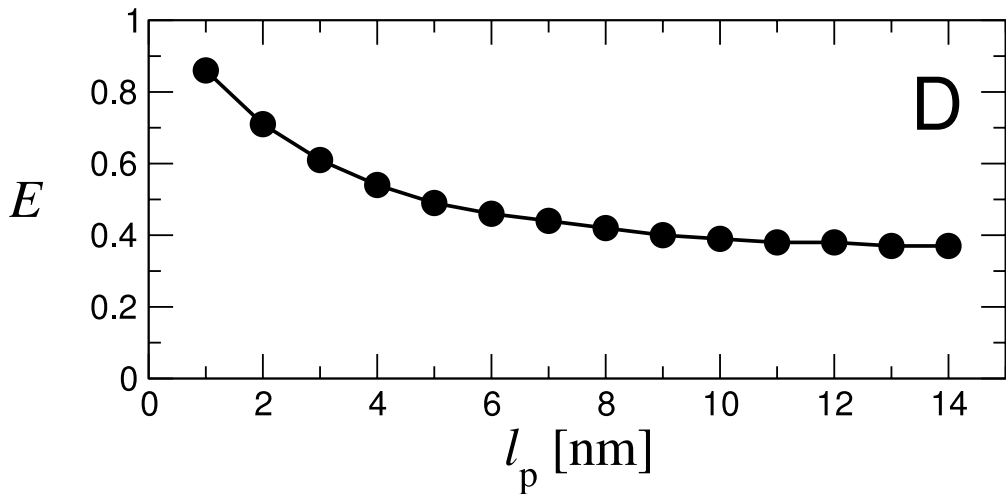

Supplement: pnas_0709567104_4.pdf [file pnas_0709567104_4.pdf]
